# Supplementary material for: A novel GABAergic population in the medial vestibular nucleus maintains wakefulness and gates rapid eye movement sleep
Source: PubMed Central journal article supplement — iScience. 2024 Feb 21;27(3):109289. doi: 10.1016/j.isci.2024.109289 (PMC10933495; doi:10.1016/j.isci.2024.109289), 2024-02-21
Supplement: mmc1.pdf [file mmc1.pdf]

iScience, Volume 27

## **Supplemental information**

### **A novel GABAergic population in the medial vestibular nucleus maintains wakefulness and gates rapid eye movement sleep**

**Daiki Nakatsuka, Takeshi Kanda, Makito Sato, Yukiko Ishikawa, Yoan  
Cherasse, and Masashi Yanagisawa**

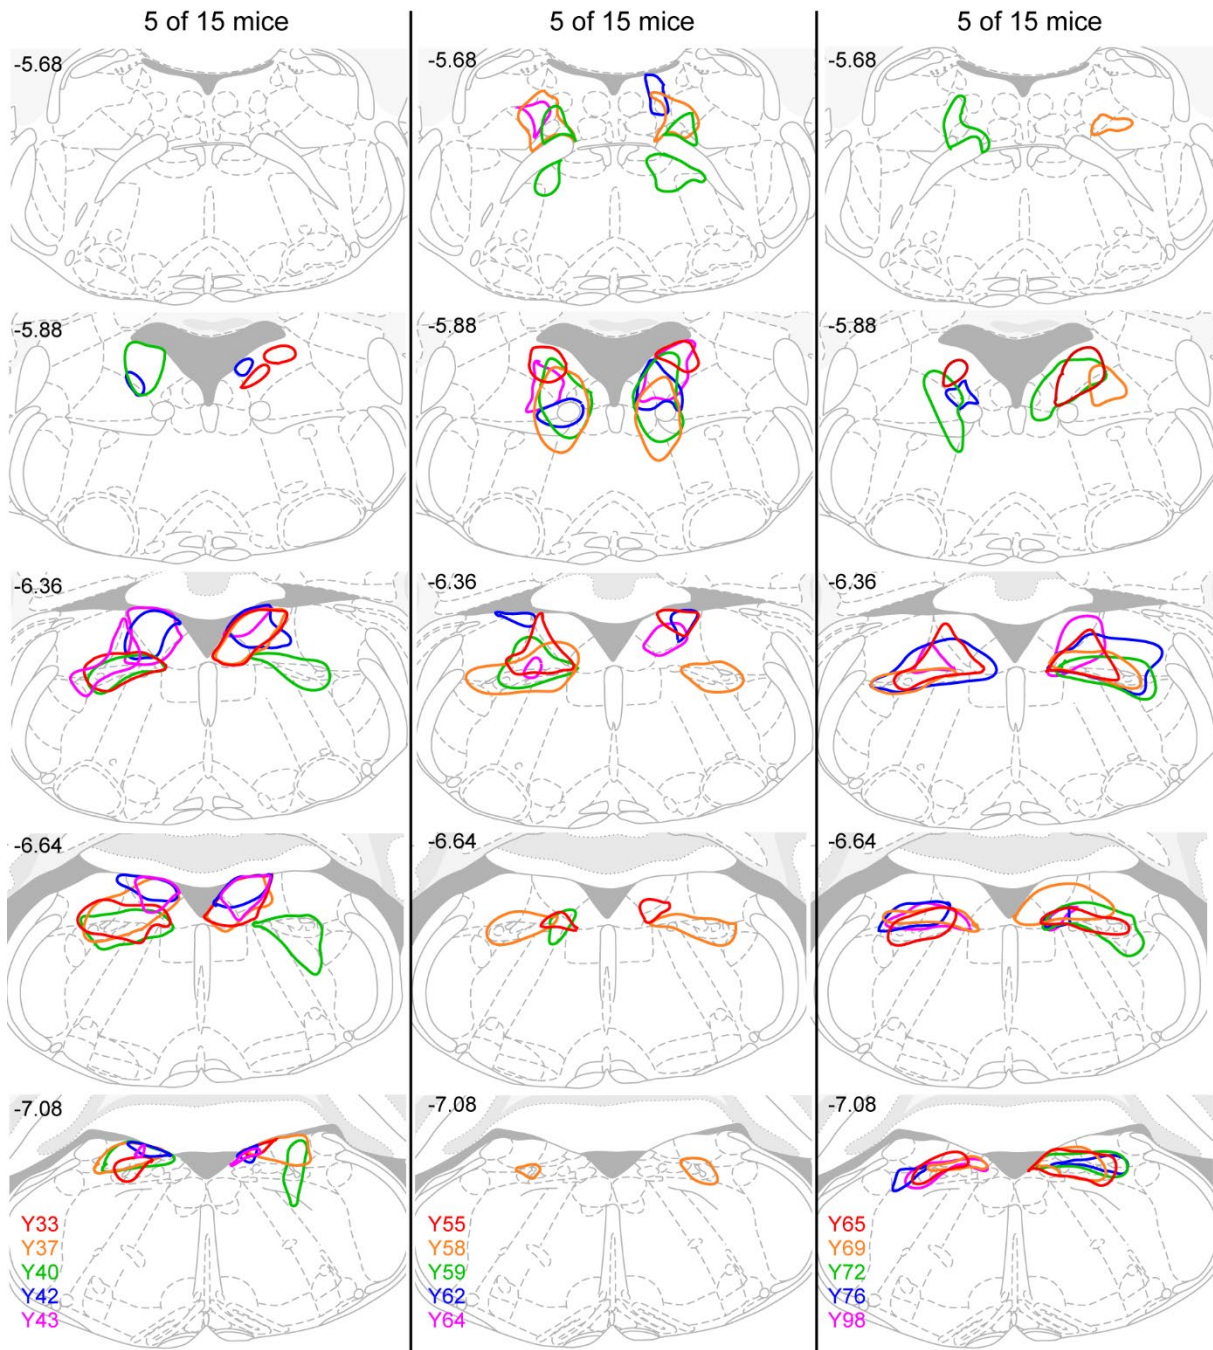

Figure S1

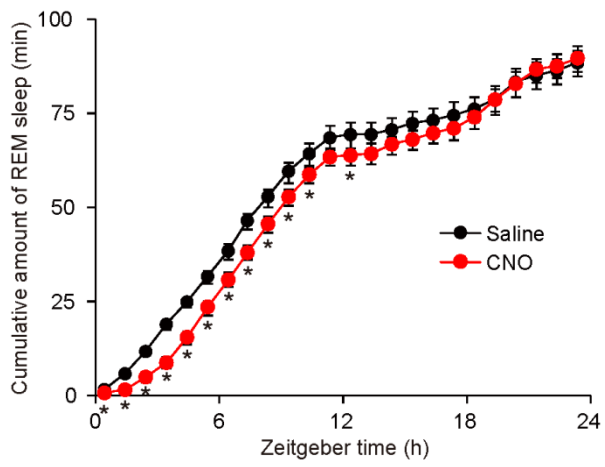

Figure S2

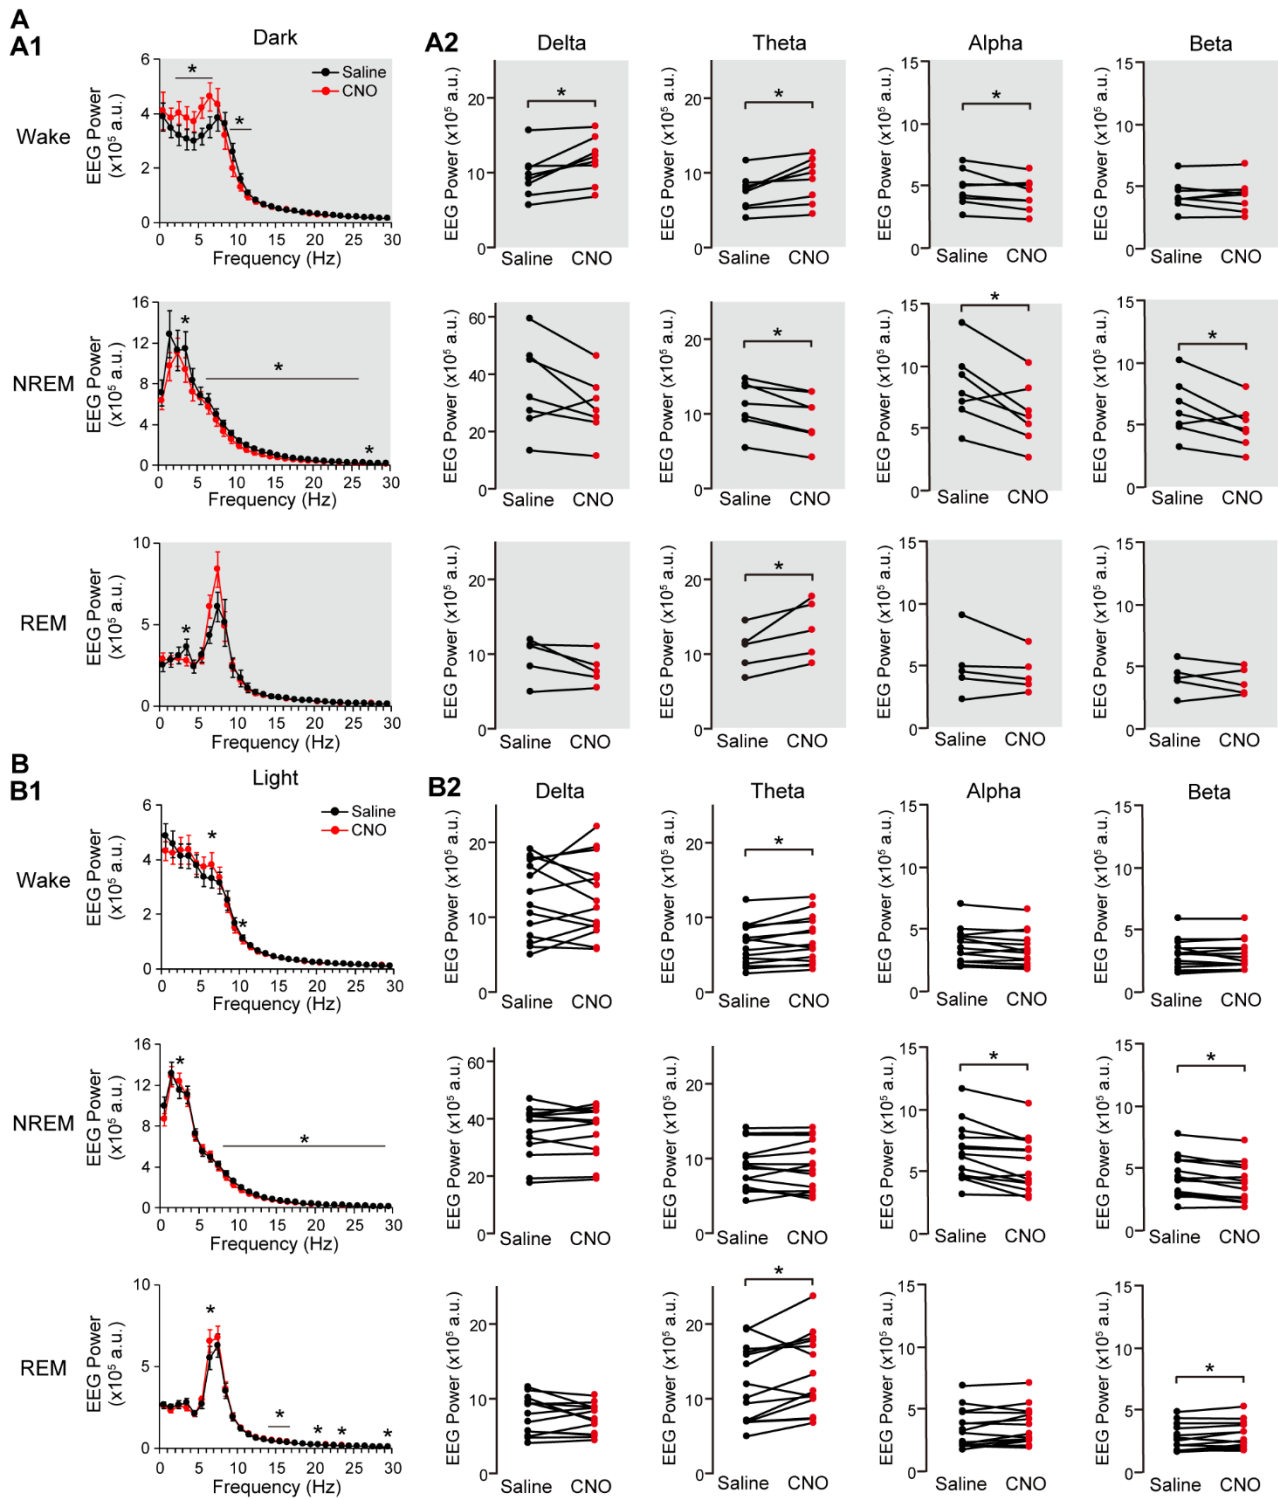

**Figure S3**

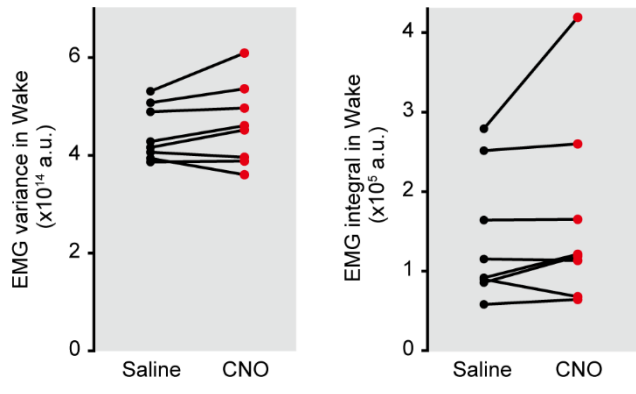

Figure S4
